# Supplementary material for: Isolation of CHS Gene from Brunfelsia acuminata Flowers and Its Regulation in Anthocyanin Biosysthesis
Source: PubMed Central journal article supplement (PMC6155851; doi:10.3390/molecules22010044), 2016-12-29
Supplement: molecules-22-00044-s001.pdf [file molecules-22-00044-s001.pdf]

# Supplementary Materials Isolation of *CHS* Gene from *Brunfelsia acuminata* Flowers and Its Regulation in Anthocyanin Biosynthesis

Min Li, Yu-Ting Cao, Si-Rui Ye, Muhammad Irshad, Teng-Fei Pan, and Dong-Liang Qiu

**Table S1.** The data for raw measurement of *BaActin* mRNA expression.

| Fluor | Target         | Content | Sample | Cq    |
|-------|----------------|---------|--------|-------|
| SYBR  | <i>BaActin</i> | Unkn    | 0d     | 10.28 |
| SYBR  | <i>BaActin</i> | Unkn    | 0d     | 10.09 |
| SYBR  | <i>BaActin</i> | Unkn    | 0d     | 10.51 |
| SYBR  | <i>BaActin</i> | Unkn    | 1d     | 10.22 |
| SYBR  | <i>BaActin</i> | Unkn    | 1d     | 10.11 |
| SYBR  | <i>BaActin</i> | Unkn    | 1d     | 10.01 |
| SYBR  | <i>BaActin</i> | Unkn    | 2d     | 11.08 |
| SYBR  | <i>BaActin</i> | Unkn    | 2d     | 11.24 |
| SYBR  | <i>BaActin</i> | Unkn    | 2d     | 11.34 |
| SYBR  | <i>BaActin</i> | Unkn    | 3d     | 11.24 |
| SYBR  | <i>BaActin</i> | Unkn    | 3d     | 11.03 |
| SYBR  | <i>BaActin</i> | Unkn    | 3d     | 11.23 |
| SYBR  | <i>BaActin</i> | Unkn    | 4d     | 10.78 |
| SYBR  | <i>BaActin</i> | Unkn    | 4d     | 11.15 |
| SYBR  | <i>BaActin</i> | Unkn    | 4d     | 10.75 |
| SYBR  | <i>BaActin</i> | Unkn    | 5d     | 11.19 |
| SYBR  | <i>BaActin</i> | Unkn    | 5d     | 11.44 |
| SYBR  | <i>BaActin</i> | Unkn    | 5d     | 11.28 |
